# Supplementary material
Source: publisher figshare collection journal article supplement (https://acs.figshare.com/ndownloader/files/21775674)
Supplement: Supplementary file 1 [file 21775674]

## SUPPORTING INFORMATION

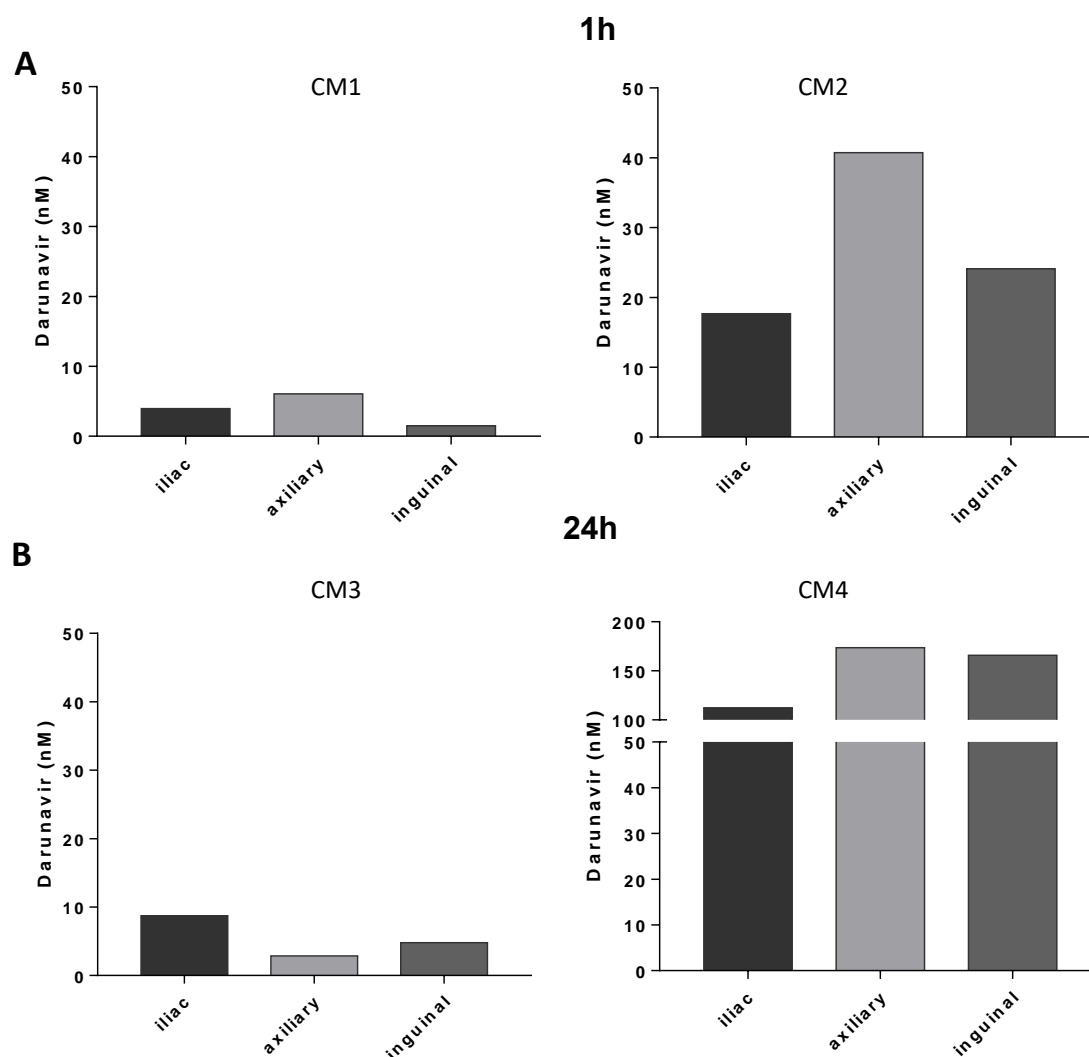

**Supplemental figure 1. Darunavir release in lymph nodes.** The dissolving film formulation of darunavir (1.7 mg) was administered vaginally to cynomolgous macaques (n=4). **A-B)** Iliac, axillary and inguinal lymph nodes were sampled from two animals at 1 hour (CM1, CM2) and 24 hours (CM3, CM4). Concentrations of darunavir were determined by HPLC-MS/MS. CM: cynomolgous macaque.

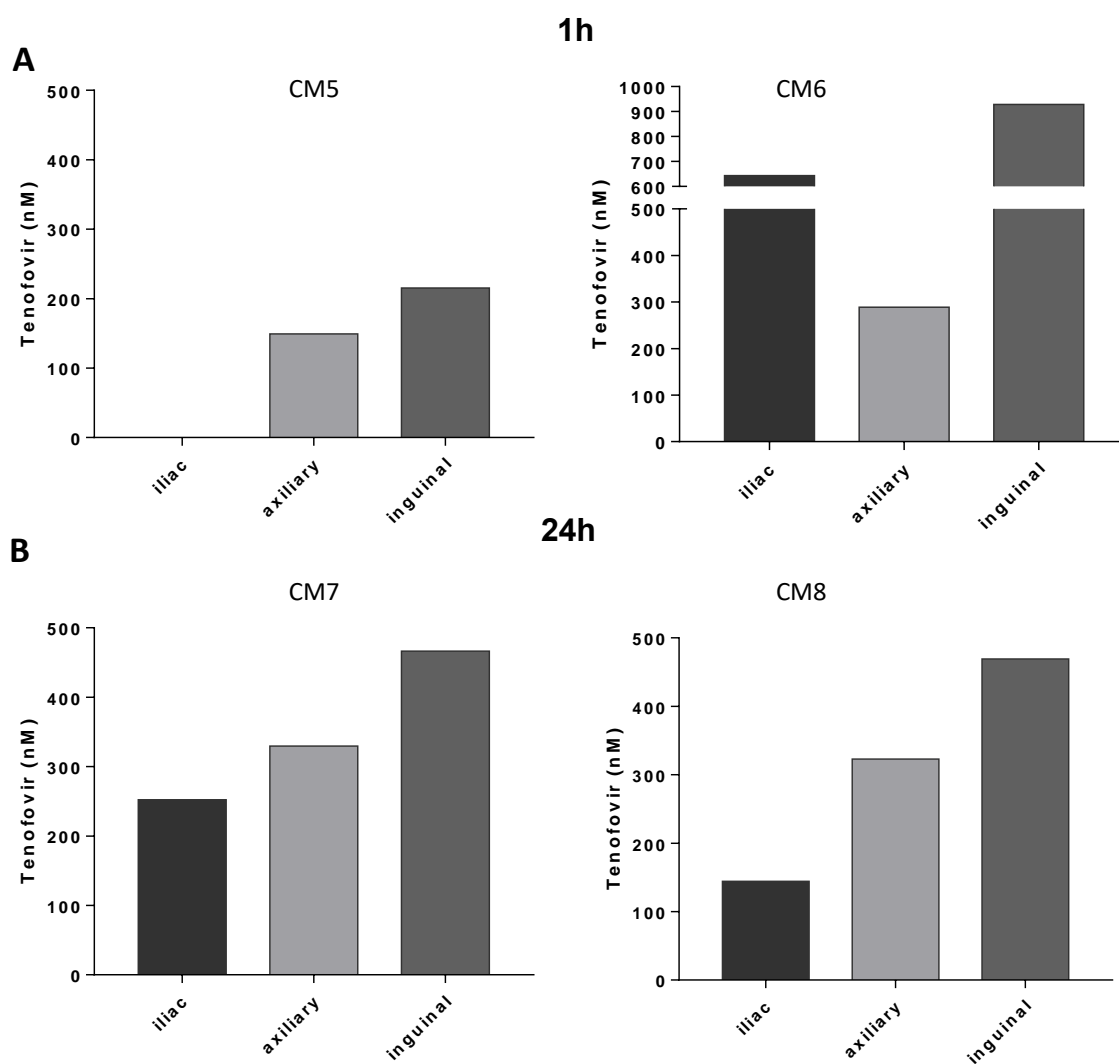

**Supplemental figure 2. Tenofovir release in lymph nodes.** The dissolving film formulation of tenofovir (7 mg) was administered vaginally to cynomolgous macaques (n=4). **A-B)** Iliac, axillary and inguinal lymph nodes were sampled from two animals at 1 hour (CM5, CM6) and 24 hours (CM7, CM8). Concentrations of tenofovir were determined by HPLC-MS/MS. CM: cynomolgous macaque.
